# Supplementary material for: Omega-3 and omega-6 DPA equally inhibit the sphingosylphosphorylcholine-induced Ca2+-sensitization of vascular smooth muscle contraction via inhibiting Rho-kinase activation and translocation
Source: PubMed Central journal article supplement (PMC5294466; doi:10.1038/srep36368), 2017-02-07
Supplement: srep36368-s1.pdf [file srep36368-s1.pdf]

Omega-3 and omega-6 DPA inhibits Ca<sup>2+</sup>-sensitization of vascular smooth muscle contraction induced by sphingosylphosphorylcholine via inhibiting Rho-kinase activation and translocation

Ying Zhang, Min Zhang, Bochao Lyu, Hiroko Kishi, and Sei Kobayashi<sup>\*</sup>

*Department of Molecular and Cellular Physiology, Yamaguchi University, Graduate School of Medicine, 1-1-1 Minami-Kogushi, Ube, Yamaguchi 755-8505, Japan*

\* Address all correspondence and requests for reprints to: Sei Kobayashi, Department of Molecular and Cellular Physiology, Yamaguchi University, Graduate School of Medicine, 1-1-1 Minami-Kogushi, Ube, Yamaguchi 755-8505, Japan

Tel: (81)-836-22-2209; Fax: (81)-836-22-2348

E-mail address: [seikoba@yamaguchi-u.ac.jp](mailto:seikoba@yamaguchi-u.ac.jp)

**Supplementary Video S1 Time-lapse video of SPC-induced contraction of vascular smooth muscle cells.** Images were acquired at 30 second intervals for 30 min.

**Supplementary Video S2 Time-lapse video of SPC-induced contraction of vascular smooth muscle cells pretreated with n-3 DPA (60  $\mu$ M) for 30 min.** Images were acquired at 30 second intervals for 30 min.

**Supplementary Video S3 Time-lapse video of SPC-induced contraction of vascular smooth muscle cells pretreated with n-6 DPA (60  $\mu$ M) for 30 min.** Images were acquired at 30 second intervals for 30 min.

# Supplementary Fig.S1

The chemical structures of n-3 DPA , n-6 DPA and EPA.

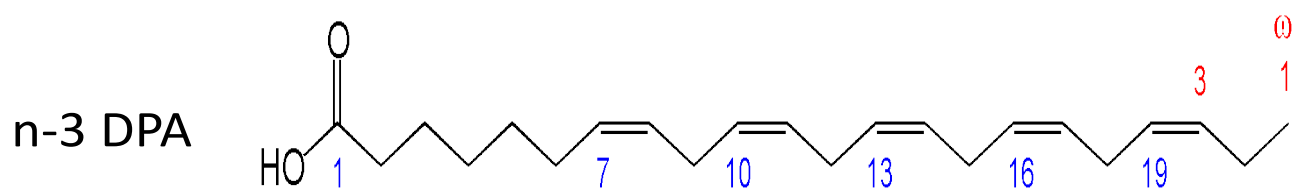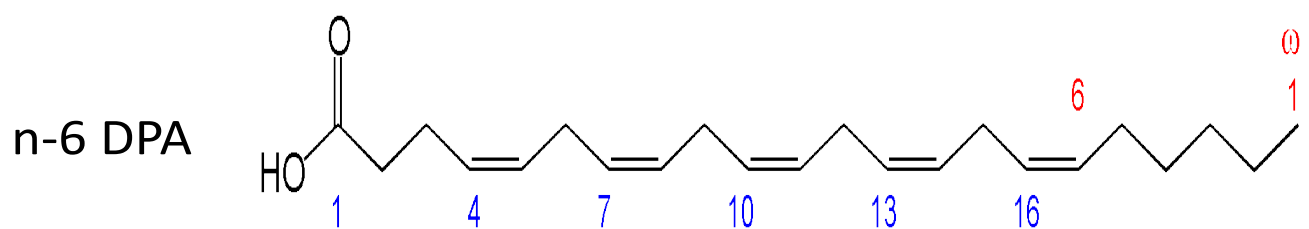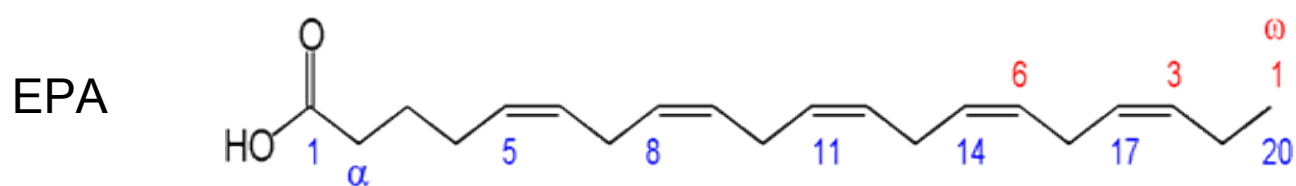

## Supplementary Fig.S2

a SPC-induced contraction in the presence of vehicle.

b 40 mM K<sup>+</sup>-induced contraction in the presence of vehicle.

c The inhibitory extent of contraction induced by n-3 DPA or n-6 DPA was calculated by a percentage of the response to the contraction induced by 30 μM SPC.

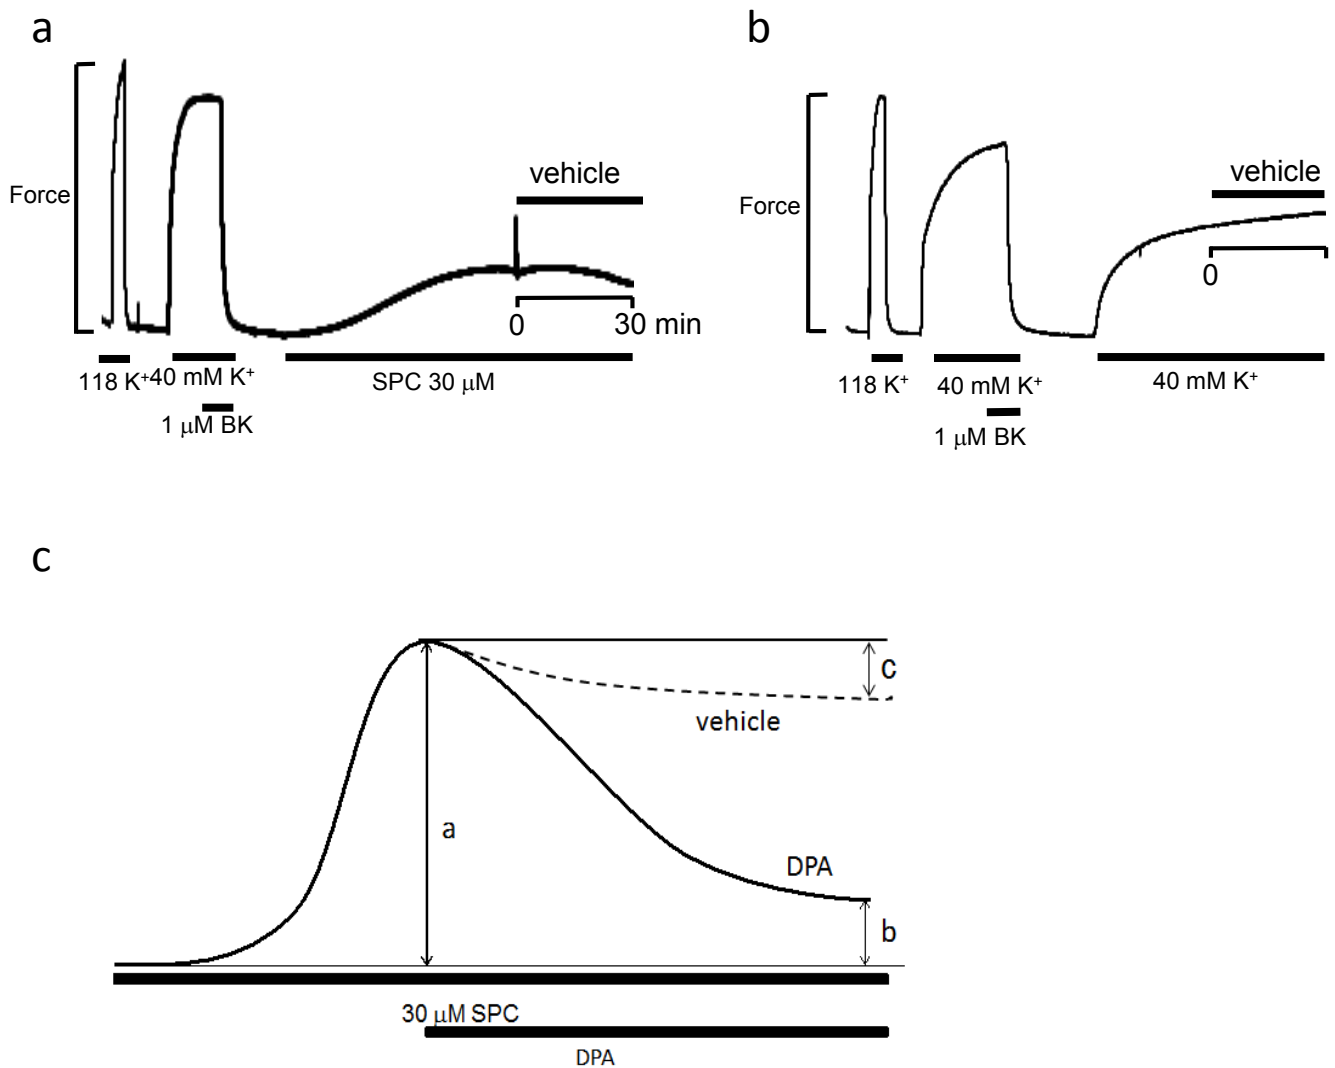

**a:** The contraction of VSM induced by SPC.

**b:** The contraction of VSM in the presence of DPA.

**c:** The contraction of VSM in the presence of vehicle.

Inhibitory ratio of DPA (%) =  $(a-b-c)/a \times 100\%$ .

### Supplementary Fig.S3

Induction of contractile type of human CASMCs after serum-free medium treatment for 2 days. Scale bar =200  $\mu\text{m}$ .

a Phase-contrast micrograph of human CASMCs in normal medium.

b Phase-contrast micrograph of human CASMCs in serum-free medium for 2 days.

a

b

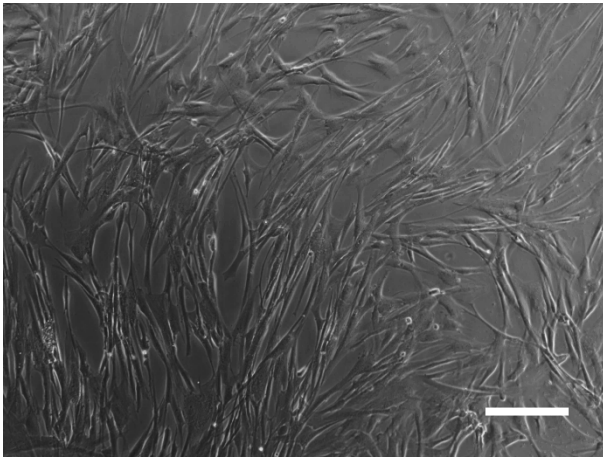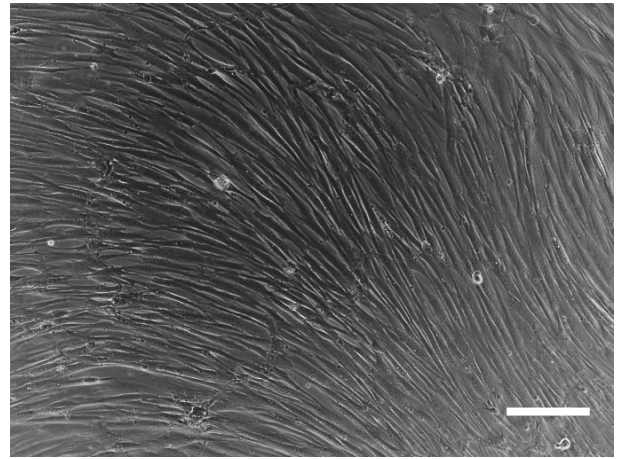

## Supplementary Fig.S4

- a Control image of immunofluorescent staining in the presence of second antibody. Scale bar = 10  $\mu\text{m}$ .
- b Translocation of Fyn induced by SPC in the presence of EPA and DPA. Scale bar = 100  $\mu\text{m}$ .

a

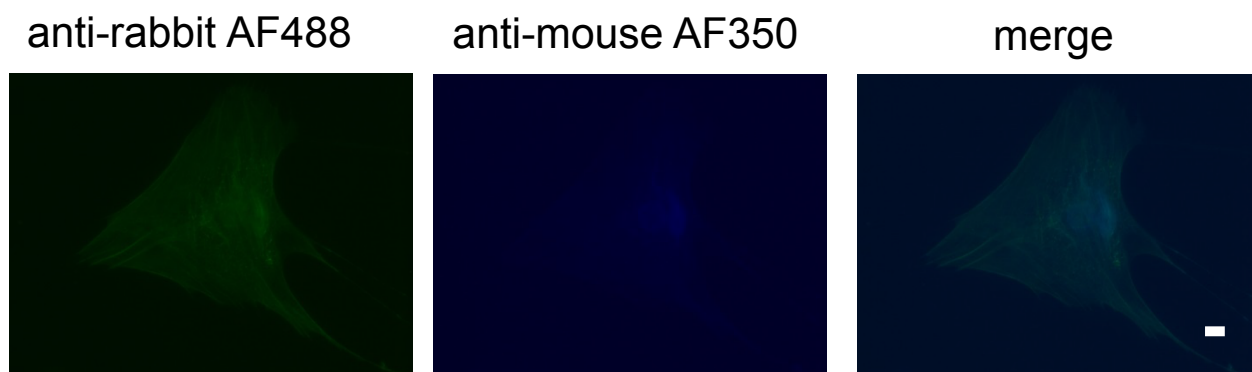

b

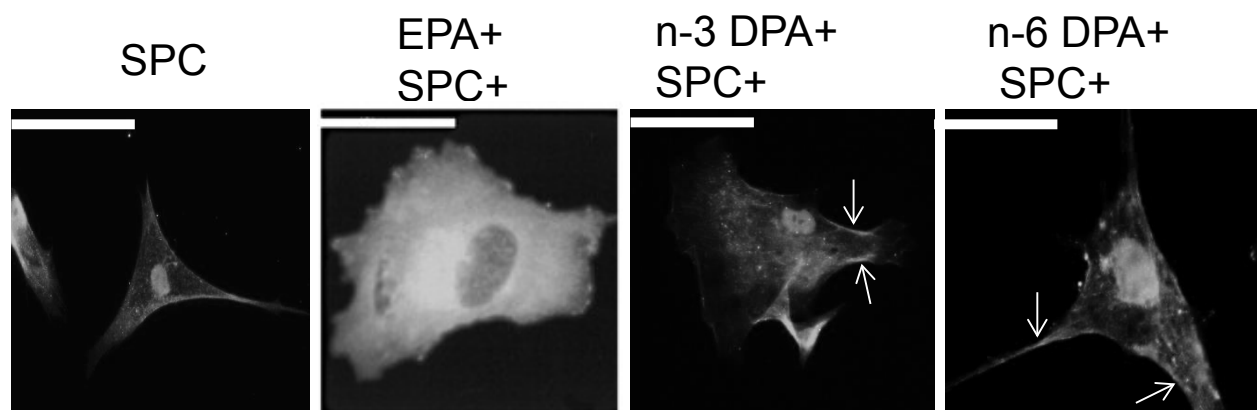

As a reference, the picture (EPA+ SPC+) obtained from our previous publication (Ref. 27) is shown.
